# Supplementary material for: Microbial Extracellular Alkaline Phosphatase Revealed the Linkage Between Carbon and Phosphorus Cycles in the Deepest Ocean
Source: Research Square preprint supplement (doi:10.21203/rs.3.rs-1425655/v1), 2022-03-11
Supplement: Supplementary file 1 [file 5de947b86b37d7d4bb82efaf.docx]

**Table S1 Calculated proxies based on APA kinetic parameters in samples**

**from the Challenger Deep, Mariana Trench**

| Depth  (m) | VDOPa  (nM h-1) | Pregb  (%) | c | d | DOP Turnovere  (Month) | f  (%) |
| --- | --- | --- | --- | --- | --- | --- |
| 50 | 56.67 | 92.2 | 0.21 | 0.05 | 13.0 | 46.1 |
| 1,000 | 35.00 | 76.7 | 0.63 | 0.12 | 6.2 | 17.3 |
| 2,000 | 37.50 | 69.0 | 0.63 | 0.14 | 5.8 | 3.3 |
| 3,000 | 33.33 | 66.0 | 0.28 | 0.18 | 6.1 | 12.4 |
| 4,200 | 35.83 | 59.5 | 0.36 | 0.12 | 6.6 | 5.6 |
| 7,000 | 35.00 | 60.4 | 0.47 | 0.16 | 5.1 | 8.6 |
| 10,918 | 35.83 | 59.5 | 0.67 | 0.16 | 5.4 | 3.2 |

aPotential hydrolysis rate of DOP at ambient concentrations, assuming the ambient DOP is

fully hydrolysable.

bRegenerated DIP, calculated based on Koeve et al. (2012).

c, dRatio of APA/Km for particle-associated and free-living fractions.

eDOP turnover time, calculated based on Duhamel et al. (2011).

fTDP, total dissolved phosphorus.
